# Supplementary material
Source: PubMed Central journal article supplement (PMC3210301)

**Figure S1**

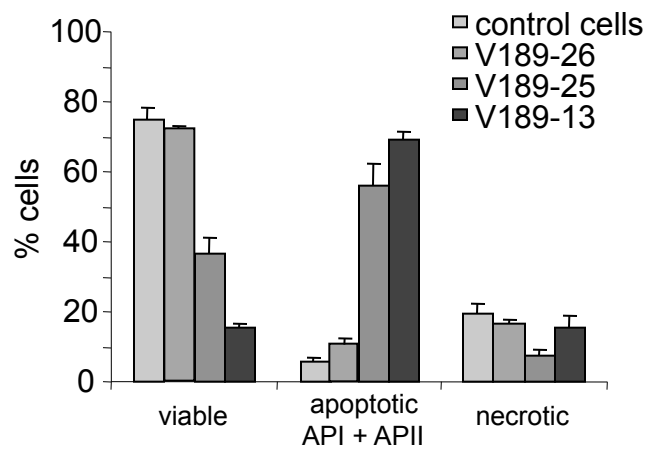

**Figure S2**

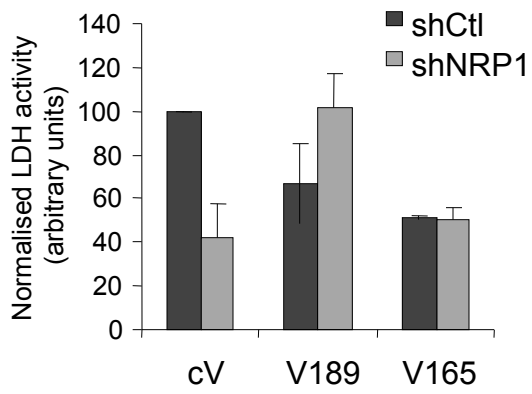

**Figure S3**

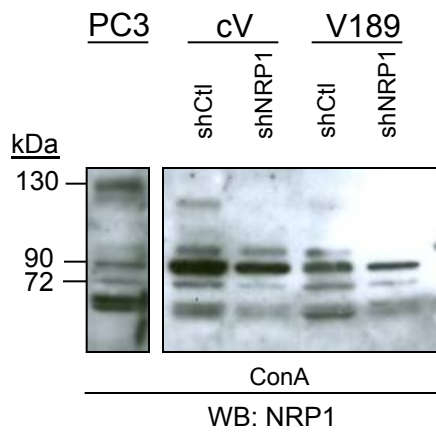

Supplement: cam0504_0332SD1.pdf [file cam0504_0332SD1.pdf]
